# Supplementary material for: Adolescent Total and Mental Health–Related Emergency Department Visits During the COVID-19 Pandemic
Source: PubMed Central journal article supplement (PMC10556969; doi:10.1001/jamanetworkopen.2023.36463), 2023-10-05
Supplement: jamanetwopen-e2336463-s001.pdf [file jamanetwopen-e2336463-s001.pdf]

## Supplemental Online Content

Villas-Boas SB, Kaplan S, White JS, Hsia RY. Adolescent total and mental health-related emergency department visits during the COVID-19 pandemic. *JAMA Netw Open*. 2023;6(10):e2336463. doi:10.1001/jamanetworkopen.2023.36463

**eAppendix.** Supporting Information on US Department of Health and Human Services (HHS) Regions

**eTable.** Keyword Syndrome Descriptions With Free-Text Reason for Visit (Chief Concern) Search Terms and Diagnosis Codes Included in Keyword Syndromes for Emergency Department Visits Associated With Mental Health Conditions (MHCs)—National Syndromic Surveillance Program

**eAppendix.** Supporting Information on US Department of Health and Human Services (HHS) Regions

The 10 HHS regions are as follows:

Region 1 – Boston: Connecticut, Maine, Massachusetts, New Hampshire, Rhode Island, and Vermont

Region 2 - New York: New Jersey, New York, Puerto Rico, and the Virgin Islands

Region 3 – Philadelphia: Delaware, District of Columbia, Maryland, Pennsylvania, Virginia, and West Virginia

Region 4 – Atlanta: Alabama, Florida, Georgia, Kentucky, Mississippi, North Carolina, South Carolina, and Tennessee

Region 5 – Chicago: Illinois, Indiana, Michigan, Minnesota, Ohio, and Wisconsin

Region 6 – Dallas: Arkansas, Louisiana, New Mexico, Oklahoma, and Texas

Region 7 - Kansas City: Iowa, Kansas, Missouri, and Nebraska

Region 8 – Denver: Colorado, Montana, North Dakota, South Dakota, Utah, and Wyoming

Region 9 - San Francisco: Arizona, California, Hawaii, Nevada, American Samoa, Commonwealth of the Northern Mariana Islands, Federated States of Micronesia, Guam, Marshall Islands, and Republic of Palau

Region 10 – Seattle: Alaska, Idaho, Oregon, and Washington

**eTable.** Keyword Syndrome Descriptions With Free-Text Reason for Visit (Chief Concern) Search Terms and Diagnosis Codes Included in Keyword Syndromes for Emergency Department Visits Associated With Mental Health Conditions (MHCs)—National Syndromic Surveillance Program

| Definition                                     | Chief Complaint Search Terms                                                                                                                                                                                                                                                                                                                                                                                                                                                                                                                                                                                                                                                                                                                                                                                                                                                                                                                                                                                                                                                                                                                                                                                 | Diagnosis Codes                                                                                                                                                                                                                                                                                                                                                                                                                                                                                                                                                                                                                                                                                                                                                                                                                                                                                                                                                                                                   |
|------------------------------------------------|--------------------------------------------------------------------------------------------------------------------------------------------------------------------------------------------------------------------------------------------------------------------------------------------------------------------------------------------------------------------------------------------------------------------------------------------------------------------------------------------------------------------------------------------------------------------------------------------------------------------------------------------------------------------------------------------------------------------------------------------------------------------------------------------------------------------------------------------------------------------------------------------------------------------------------------------------------------------------------------------------------------------------------------------------------------------------------------------------------------------------------------------------------------------------------------------------------------|-------------------------------------------------------------------------------------------------------------------------------------------------------------------------------------------------------------------------------------------------------------------------------------------------------------------------------------------------------------------------------------------------------------------------------------------------------------------------------------------------------------------------------------------------------------------------------------------------------------------------------------------------------------------------------------------------------------------------------------------------------------------------------------------------------------------------------------------------------------------------------------------------------------------------------------------------------------------------------------------------------------------|
| <b>CDC Overall Mental Health Conditions v1</b> | Schizophrenia (include misspellings)<br>Schizotypal (include misspellings)<br>Schizoaffective (include misspellings)<br>Grief (include misspellings)<br>Grieve (include misspellings)<br>Bereave (include misspellings)<br>Psych<br>Mental health<br>Mental evaluation<br>Mental problem<br>Mentally<br>Mental illness<br>Reactive attachment<br>Auditory hallucination<br>Visual hallucination<br>Hearing voice<br>Evaluation hallucination<br>History of hallucination<br>Hallucinations patient<br>Hallucinations unspecified<br>Seeing thing<br>Delusion (include misspellings)<br>Paranoia (include misspellings)<br>Trichotillomania<br>Dissociative disorder<br>Dissociative conversion<br>Dissociative identity<br>Dissociative and conversion<br>Dissociative tendency<br>Dissociative episode<br>Dissociative conversion<br>Dissociative behavior<br>Dissociative amnesia<br>Dissociative attentive<br>Experiencing dissociation<br>Dissociative (when used with depress, depression, psych, dysthymic, anxiety, anxious, traumatic stress, PTSD, adjustment disorder, mental, attention deficit, bipolar, schizophrenia, schizoaffective, schizotypal – and associated misspellings of all terms) | 295.00; 295.01; 295.02; 295.03; 295.04; 295.10; 295.11;<br>295.12; 295.13; 295.14; 295.20; 295.21; 295.22; 295.23;<br>295.24; 295.30; 295.31; 295.32; 295.33; 295.34; 295.40;<br>295.41; 295.42; 295.43; 295.44; 295.50; 295.51; 295.52;<br>295.53; 295.54; 295.60; 295.61; 295.62; 295.63; 295.64;<br>295.70; 295.71; 295.72; 295.73; 295.74; 295.80; 295.81;<br>295.82; 295.83; 295.84; 295.90; 295.91; 295.92; 295.93;<br>295.94; 296.90; 296.99; 297.0; 297.1; 297.2; 297.3; 297.8;<br>297.9; 298.0; 298.1; 298.2; 298.3; 298.4; 298.8; 298.9;<br>300.10; 300.11; 300.12; 300.13; 399.14; 300.15; 300.81;<br>300.82; 300.89; 300.7; 307.80; 307.89; 300.9 648.40; 648.41,<br>648.42, 648.43; 648.44; V62.82<br><br>F20; F21; F22; F23; F25; F28; F29; F39; F44; F45; F48; F53.1;<br>F54; F63.3; F93.8; F93.9; F94; F98.9; F99; Z63.4<br><br>413307004; 74732009; 231538003; 268664001; 48500005;<br>191667009; 41526007; 18193002; 224965009; 74506000;<br>58214004; 268617001; 64905009; 191526005; 68890003 |

|                                                         |                                                                                                                                                                                                                                                                                                                                                                                                |                                                                                                                                                                                                                                                                                                                                                                                 |
|---------------------------------------------------------|------------------------------------------------------------------------------------------------------------------------------------------------------------------------------------------------------------------------------------------------------------------------------------------------------------------------------------------------------------------------------------------------|---------------------------------------------------------------------------------------------------------------------------------------------------------------------------------------------------------------------------------------------------------------------------------------------------------------------------------------------------------------------------------|
| <b>CDC Depressive Disorders v1</b>                      | Depression<br>Dysthymic<br>Dysthymic<br>Mood disorder<br>Mood disturbance                                                                                                                                                                                                                                                                                                                      | 296.20; 296.21; 296.22; 296.23; 296.24; 296.25; 296.30;<br>296.31; 296.32; 296.33; 296.34; 296.35; 300.4; 309.0; 309.1;<br>296.90; 296.99; 309.28<br><br>F32 (except F32.5); F33 (except F33.42); F34.1; F34.9;<br>F43.21; F43.23; O90.6<br><br>35489007; 310497006; 370143000; 712823008; 57194009                                                                             |
| <b>CDC Attention-Deficit/Hyperactivity Disorders v1</b> | Attention deficit<br>Hyperactivity<br>Attention problems                                                                                                                                                                                                                                                                                                                                       | 314.00, 314.01; 314.9; 314.2<br><br>F90 (include all in this series)<br><br>406506008<br>35253001                                                                                                                                                                                                                                                                               |
| <b>CDC Trauma and Stressor-related Disorders v1</b>     | Traumatic stress<br>PTSD (including misspellings)<br>Adjustment disorder<br>Reaction to acute stress<br>Acute stress reaction<br>Acute stress crisis<br>Acute stress eval<br>Eval acute stress<br>Acute stress behavior (including misspellings for behavior)<br>Behavior acute stress<br>Behavior acute stress<br>Reaction to severe stress<br>Severe stress reaction<br>Severe stress crisis | 308.0; 308.1; 308.2; 308.3; 308.4; 308.9; 309.81; 309.89;<br>309.9; 309.0; 309.1; 309.24; 309.28; 309.29; 309.3; 309.4<br><br>F43<br><br>67195008; 47505003; 17226007; 57194009; 271952001                                                                                                                                                                                      |
| <b>CDC Disruptive Behavioral and Impulse-Control v1</b> | Conduct disorder<br>Oppositional defiant (with spelling mistakes for "defiant")<br>Antisocial personality<br>Disturbance of conduct<br>Impulse control disorder<br>Explosive disorder                                                                                                                                                                                                          | 309.3; 309.4; 312.00; 312.01; 312.02; 312.03; 312.10;<br>312.11; 312.12; 312.13; 312.20, 312.21; 312.22; 312.23;<br>312.4; 312.81; 312.82; 312.89; "312.9; 312.30; 312.31;<br>312.39; 313.81; 314.2; 301.7<br><br>F43.24; F43.25; F91.0; F91.1; F91.2; F91.3; F91.8; F91.9;<br>F63.81; F63.1; F63.2; F63.9; F63.0; F63.89; F60.2<br><br>54319003; 18941000; 430909002; 26665006 |

|                                 |                                                                                                                                                                                                                                                                                                                                                                                                                                                                                                                                                                                                                                                                                                                                                                                                                                                                                                                                                                                                                                                                                          |                                                                                                                                                                                                                                                                                                                                                                                                                                                                                                               |
|---------------------------------|------------------------------------------------------------------------------------------------------------------------------------------------------------------------------------------------------------------------------------------------------------------------------------------------------------------------------------------------------------------------------------------------------------------------------------------------------------------------------------------------------------------------------------------------------------------------------------------------------------------------------------------------------------------------------------------------------------------------------------------------------------------------------------------------------------------------------------------------------------------------------------------------------------------------------------------------------------------------------------------------------------------------------------------------------------------------------------------|---------------------------------------------------------------------------------------------------------------------------------------------------------------------------------------------------------------------------------------------------------------------------------------------------------------------------------------------------------------------------------------------------------------------------------------------------------------------------------------------------------------|
| <b>CDC Bipolar Disorders v1</b> | Bipolar<br>Manic<br>Cyclothymic<br>Mania<br>Hypomania<br>Hypermania                                                                                                                                                                                                                                                                                                                                                                                                                                                                                                                                                                                                                                                                                                                                                                                                                                                                                                                                                                                                                      | 296.00; 296.01; 296.02; 296.03; 296.04; 296.05; 296.40;<br>296.41; 296.42; 296.43; 296.44; 296.45; 296.50; 296.51;<br>296.52; 296.53; 296.54; 296.55; 296.60; 296.61; 296.62;<br>296.63; 296.64; 296.65; 296.7<br>296.80; 296.81; 296.82; 296.89<br><br>F30.1; F30.2; F30.3; F30.8; F30.9; F31.0; F31.1; F31.2; F31.3;<br>F31.4; F31.5; F31.6; F31.7 (only include: F31.70, F31.71,<br>F31.73, F31.75, F31.77); F31.8; F31.9; F34.0<br><br>191627008; 371596008; 83225003; 231494001; 284513006;<br>268619003 |
| <b>CDC Eating Disorders v1</b>  | Pica<br>Bulimia (including misspellings)<br>Binge eating (including misspellings of binge)<br>Binge-eating<br>Eating disorder<br>Rumination disorder<br>Binging or purging<br>Binging and purging<br>Weight loss or anorexia<br>Anorexia nervosa (including misspellings of anorexia)<br>Anorexic (including misspellings of anorexic)<br>Being treated for anorexia (including misspellings of anorexia)<br>Treatment for (including misspellings of anorexia)<br>Weight loss (including misspellings of weight; include when used with anorexia)<br>Loss of weight (including misspellings of weight; include when used with anorexia)<br>Weight loss (including misspellings of weight; include when used with anorexia)<br>Loss of weight (including misspellings of weight; include when used with anorexia)<br>Eating disorder<br>Anorexia history (including misspellings of anorexia)<br>History of anorexia (including misspellings of anorexia)<br>Mental anorexia (including misspellings of anorexia)<br>Mental (when used with anorexia)<br>Psych (when used with anorexia) | 307.1; 307.50; 307.51; 307.52; 307.53; 307.54; 307.59<br><br>F50.00; F50.01; F50.02; F50.2; F50.8; F50.82; F50.89; F50.9;<br>F98.21; F98.29; F98.3<br><br>72366004; 56882008; 7800400; 32721004                                                                                                                                                                                                                                                                                                               |

|                                              |                                                                              |                                                                          |
|----------------------------------------------|------------------------------------------------------------------------------|--------------------------------------------------------------------------|
| <b>CDC Tic Disorders v1</b>                  | Neurological tic<br>Tic disorder<br>Behavioral tic<br>Facial tic<br>Face tic | 307.20; 307.21; 307.22; 307.23<br><br>F95; G25.69<br><br>568005; 5158005 |
| <b>CDC Obsessive-Compulsive Disorders v1</b> | Obsessive compulsive<br>Compulsive disorder                                  | 300.3<br><br>F42<br><br>191736004                                        |
