# Supplementary material for: Adolescent Total and Mental Health–Related Emergency Department Visits During the COVID-19 Pandemic
Source: PubMed Central journal article supplement (PMC10556969; doi:10.1001/jamanetworkopen.2023.36463), 2023-10-05
Supplement: jamanetwopen-e2336463-s002.pdf [file jamanetwopen-e2336463-s002.pdf]

## Data Sharing Statement

Villas-Boas. Adolescent Total and Mental Health–Related Emergency Department Visits During the COVID-19 Pandemic. *JAMA Netw Open*. Published October 05, 2023.  
doi:10.1001/jamanetworkopen.2023.36463

### Data

**Data available:** No
